# Supplementary material for: Islands and hybrid zones: combining the knowledge from “Natural Laboratories” to explain phylogeographic patterns of the European brown hare
Source: BMC Evol Biol. 2019 Jan 10;19:17. doi: 10.1186/s12862-019-1354-y (PMC6329171; doi:10.1186/s12862-019-1354-y)
Supplement: Supplementary file 1 — Table S3. Pocket frequencies per population. (PDF 23 kb) [file 12862_2019_1354_MOESM1_ESM.pdf]

*Additional table 3: Pocket frequencies per population*

| <b>Pocket 1</b> | <b>N.Zealand</b> | <b>Samos</b> | <b>Rodos</b> | <b>Mytilini</b> | <b>Chios</b> | <b>Cyprus</b> |
|-----------------|------------------|--------------|--------------|-----------------|--------------|---------------|
| <b>YHEFWR</b>   | 92.11            | 51.43        | 66.67        | 41.70           | 20.59        | 17.50         |
| <b>YHLFWT</b>   | 5.26             | 0.00         | 0.00         | 25.00           | 0.00         | 2.50          |
| <b>YHQFWT</b>   | 0.00             | 4.29         | 33.33        | 33.30           | 79.41        | 0.00          |
| <b>YHEFWA</b>   | 2.63             | 0.00         | 0.00         | 0.00            | 0.00         | 0.00          |
| <b>YHQFWA</b>   | 0.00             | 44.29        | 0.00         | 0.00            | 0.00         | 80.00         |
|                 |                  |              |              |                 |              |               |
| <b>Pocket 6</b> |                  |              |              |                 |              |               |
| <b>NETAN</b>    | 97.37            | 51.43        | 66.67        | 66.67           | 20.00        | 20.00         |
| <b>NNTAN</b>    | 2.63             | 48.57        | 33.33        | 33.33           | 0.00         | 0.00          |
| <b>NNTEN</b>    | 0.00             | 0.00         | 0.00         | 0.00            | 25.00        | 25.00         |
| <b>NNTAG</b>    | 0.00             | 0.00         | 0.00         | 0.00            | 55.00        | 55.00         |
|                 |                  |              |              |                 |              |               |
| <b>Pocket 9</b> |                  |              |              |                 |              |               |
| <b>YNILR</b>    | 97.37            | 100.00       | 83.33        | 66.67           | 94.12        | 45.00         |
| <b>YNIMR</b>    | 2.63             | 0.00         | 16.67        | 33.33           | 5.88         | 0.00          |
| <b>YGIMR</b>    | 0.00             | 0.00         | 0.00         | 0.00            | 0.00         | 55.00         |
